# Supplementary figures and images for: Radiographic benefit and maintenance of clinical benefit with intravenous golimumab therapy in patients with active rheumatoid arthritis despite methotrexate therapy: results up to 1 year of the phase 3, randomised, multicentre, double blind, placebo controlled GO-FURTHER trial
Source: PubMed Central journal article supplement — Ann Rheum Dis. 2013 Sep 3;73(12):2152–9. doi: 10.1136/annrheumdis-2013-203742 (PMC4251163; doi:10.1136/annrheumdis-2013-203742), 2013-09-03

**Figure S1.**

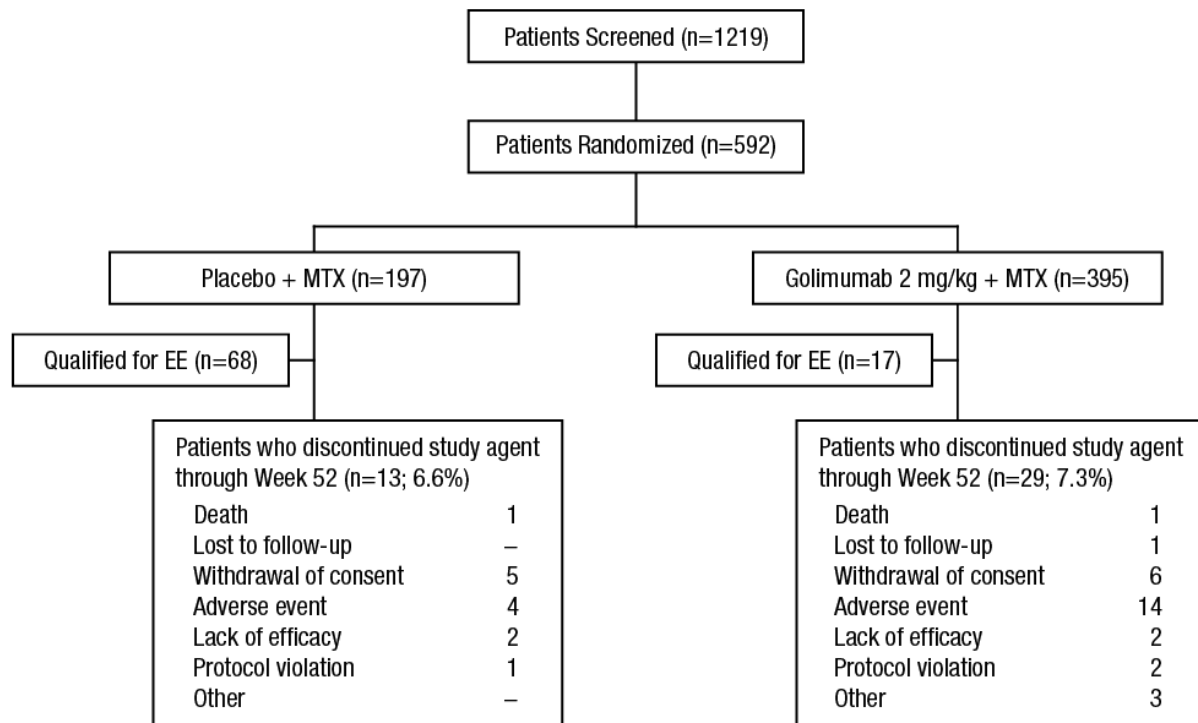

GOL-18-1-1\_v6

Supplement: annrheumdis-2013-203742-s2.pdf [file annrheumdis-2013-203742-s2.pdf]

Figure S2.

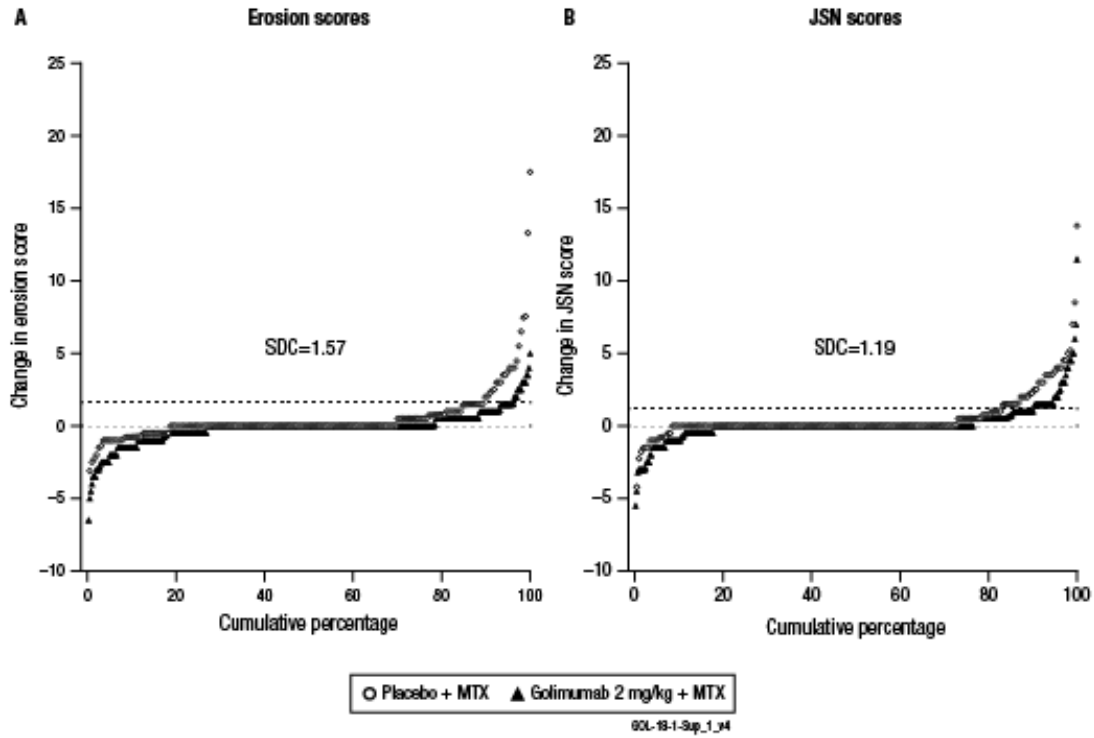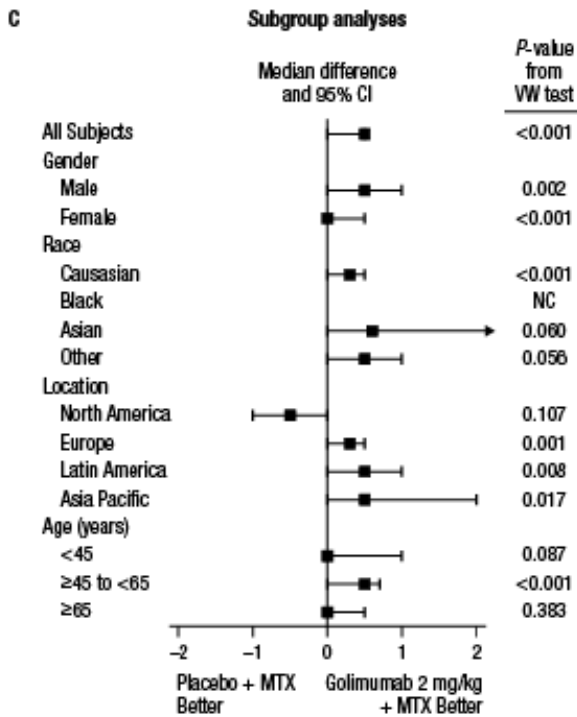

Supplement: annrheumdis-2013-203742-s3.pdf [file annrheumdis-2013-203742-s3.pdf]
