# Supplementary figures and images for: Radiographic benefit and maintenance of clinical benefit with intravenous golimumab therapy in patients with active rheumatoid arthritis despite methotrexate therapy: results up to 1 year of the phase 3, randomised, multicentre, double blind, placebo controlled GO-FURTHER trial
Source: HighWire-hosted journal article supplement (doi:10.1136/annrheumdis-2013-203742), 2013-09-04

Figure S3.

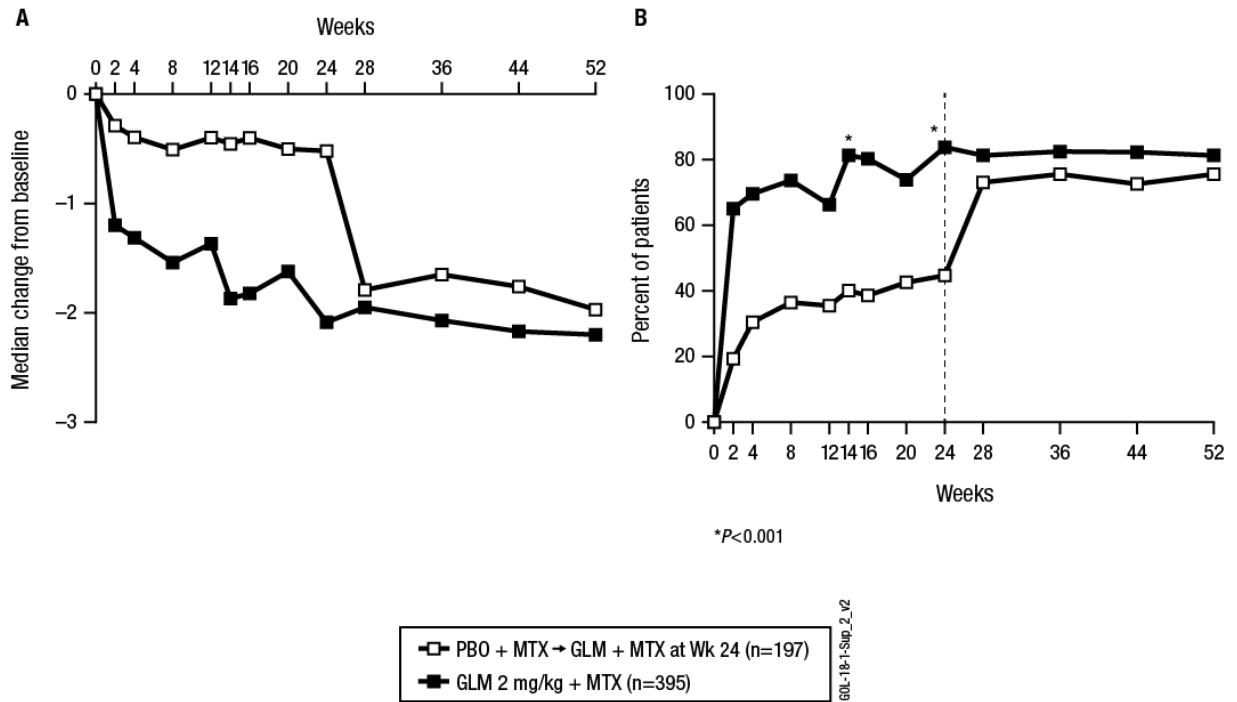

Supplement: annrheumdis-2013-203742supp_figure3.pdf [file annrheumdis-2013-203742supp_figure3.pdf]
